# Supplementary material
Source: MDPI journal article supplement (https://www.mdpi.com/search?q=ijms-22-03695)
Supplement: s001 [file ijms-22-03695-s001.pdf]

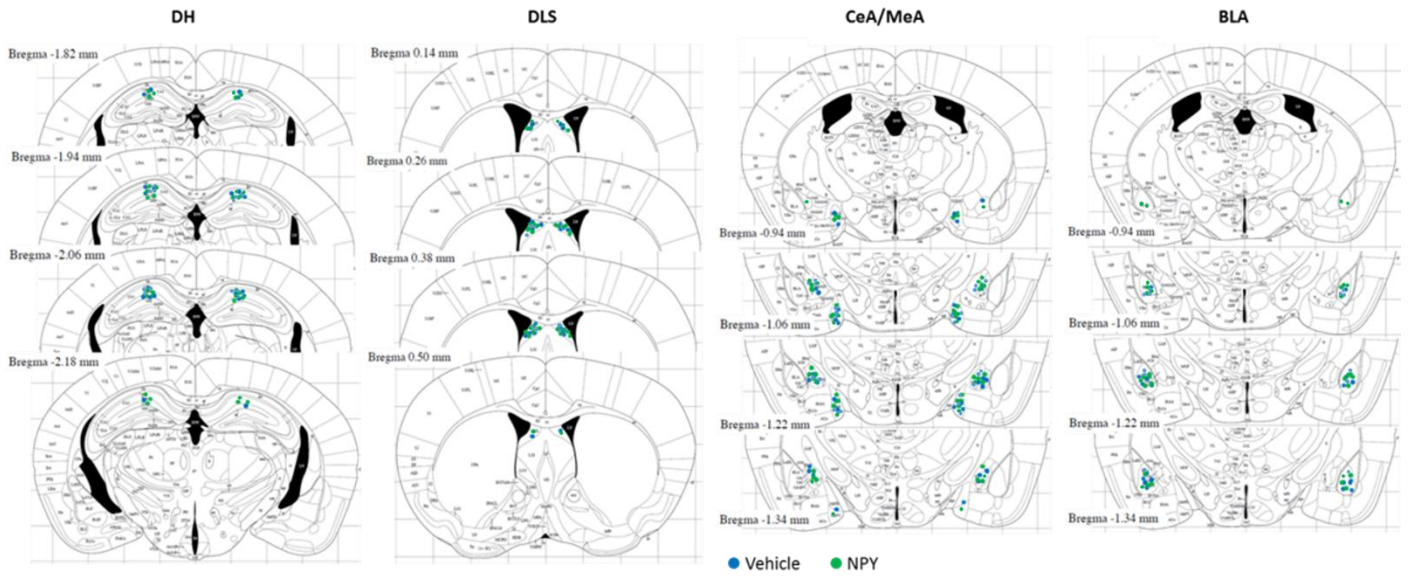

**Figure S1.** Schematic illustration of coronal sections of the mouse brain showing the infusion sites. DH, dorsal hippocampus; DLS, dorsolateral septum; CeA, central amygdala; MeA, medial amygdala; BLA, basolateral amygdala; NPY, neuropeptide Y.
